# Supplementary material
Source: publisher site journal article supplement (https://www.dovepress.com/article/254365)

## **Supplementary information**

**Supplemental Table S1.** Subgroup analysis of progression-free survival for three CDK4/6 inhibitors.

**Supplemental Figure S1.** Forest plot comparison of three CDK4/6 inhibitors.

**Supplemental Figure S2.** Sensitivity analysis.

**Supplemental Table S1** Subgroup analysis of progression-free survival for three CDK4/6 inhibitors

| Subgroup                       | Pooled Hazard Ratio for PFS (95% CI) |                 |                 |
|--------------------------------|--------------------------------------|-----------------|-----------------|
|                                | Palbo+ET vs ET                       | Ribo+ET vs ET   | Abema+ET vs ET  |
| Age                            |                                      |                 |                 |
| <65 yr                         | 0.44(0.25-0.79)                      | 0.57(0.46-0.70) | 0.53(0.42-0.65) |
| ≥65 yr                         | 0.55(0.40-0.77)                      | 0.60(0.47-0.78) | 0.60(0.46-0.79) |
| Race                           |                                      |                 |                 |
| White                          | 0.58(0.45-0.74)                      | 0.60(0.52-0.70) | 0.64(0.52-0.80) |
| Asian                          | 0.48(0.27-0.86)                      | 0.57(0.27-1.18) | 0.41(0.24-0.69) |
| Other                          | -                                    | 0.88(0.20-3.9)  | 0.30(0.12-0.8)  |
| Region                         |                                      |                 |                 |
| North America                  | 0.60(0.43-0.84)                      | 0.54(0.29-1.01) | 0.49(0.33-0.73) |
| Europe                         | 0.57(0.41-0.80)                      | 0.63(0.44-0.91) | 0.62(0.45-0.85) |
| Asia                           | 0.49(0.27-0.88)                      | 0.42(0.27-0.66) | 0.52(0.36-0.75) |
| ECOG performance status        |                                      |                 |                 |
| 0                              | 0.57(0.39-0.83)                      | 0.56(0.48-0.66) | 0.51(0.41-0.63) |
| 1                              | 0.50(0.38-0.66)                      | 0.56(0.45-0.71) | 0.62(0.48-0.80) |
| Site of metastatic disease     |                                      |                 |                 |
| Visceral                       | 0.55(0.45-0.67)                      | 0.57(0.48-0.68) | 0.52(0.42-0.65) |
| Bone only                      | 0.35(0.22-0.55)                      | 0.55(0.37-0.84) | 0.55(0.38-0.80) |
| Nonvisceral                    | 0.46(0.36-0.59)                      | 0.58(0.48-0.71) | -               |
| Other                          | 0.40(0.20-0.81)                      | 0.58(0.50-0.67) | 0.54(0.22-1.30) |
| Prior chemotherapy             | Prior chemotherapy                   |                 |                 |
| Yes                            | 0.54(0.44-0.68)                      | 0.55(0.41-0.74) | -               |
| No                             | 0.44(0.29-0.67)                      | 0.56(0.46-0.70) |                 |
| Prior endocrine therapy        |                                      |                 |                 |
| Yes                            | 0.52(0.40-0.68)                      | 0.59(0.47-0.73) | -               |
| No                             | 0.52(0.33-0.81)                      | 0.55(0.45-0.67) | 0.51(0.34-0.76) |
| Prior aromatase inhibitor      | 0.45(0.32-0.62)                      | 0.61(0.50-0.73) | 0.42(0.24-0.73) |
| Prior tamoxifen                | 0.57(0.41-0.79)                      | 0.60(0.48-0.74) | 0.92(0.50-1.70) |
| No. of disease sites           |                                      |                 |                 |
| 1                              | 0.53(0.38-0.72)                      | -               | 0.54(0.38-0.76) |
| 2                              | 0.37(0.24-0.58)                      | 0.59(0.45-0.77) | 0.41(0.29-0.60) |
| ≥3                             | 0.50(0.33-0.76)                      | 0.62(0.44-0.87) | 0.75(0.52-1.08) |
| Disease-free interval (≤12 mo) | 0.46(0.34-0.63)                      | 0.56(0.37-0.86) | -               |
| Disease-free interval          | 0.50(0.36-0.68)                      | 0.62(0.46-0.83) | -               |

|                                              |                 |                 |                 |
|----------------------------------------------|-----------------|-----------------|-----------------|
| (>12 mo)                                     |                 |                 |                 |
| Disease setting<br>(De Novo<br>Metastatic)   | -               | 0.45(0.27-0.75) | 0.49(0.31-0.77) |
| Disease setting<br>(Metastatic<br>Recurrent) | -               | 0.60(0.45-0.80) | 0.59(0.41-0.85) |
| Pre-or<br>perimenopause                      | 0.50(0.29-0.87) | -               | 0.42(0.25-0.70) |
| Postmenopausal                               | 0.45(0.34-0.59) | -               | 0.58(0.46-0.73) |
| PgR status<br>(Positive)                     | -               | 0.59(0.49-0.71) | 0.59(0.49-0.72) |
| PgR status<br>(Negative)                     | -               | 0.40(0.27-0.60) | 0.48(0.34-0.68) |
| Measurable disease<br>(Yes)                  | 0.66(0.52-0.84) | -               | 0.53(0.44-0.64) |
| Measurable disease<br>(No)                   | 0.35(0.22-0.56) | -               | 0.59(0.41-0.84) |
| Previous systemic<br>therapy (Yes)           | 0.45(0.35-0.57) | -               | -               |
| Previous systemic<br>therapy (No)            | 0.44(0.27-0.70) | -               | -               |

**Abbreviations:** PFS, progression-free survival; CI, confidence interval; yr, year; Palbo, palbociclib; Ribo, ribociclib; Abema, abemaciclib; AI, aromatase inhibitors; Ful, fulvestrant; ET, endocrine therapy; ECOG, Eastern Cooperative Oncology Group; mo, months; PgR, progesterone receptor.

Supplemental Figure S1. Forest plot comparison of three CDK46 inhibitors.

A

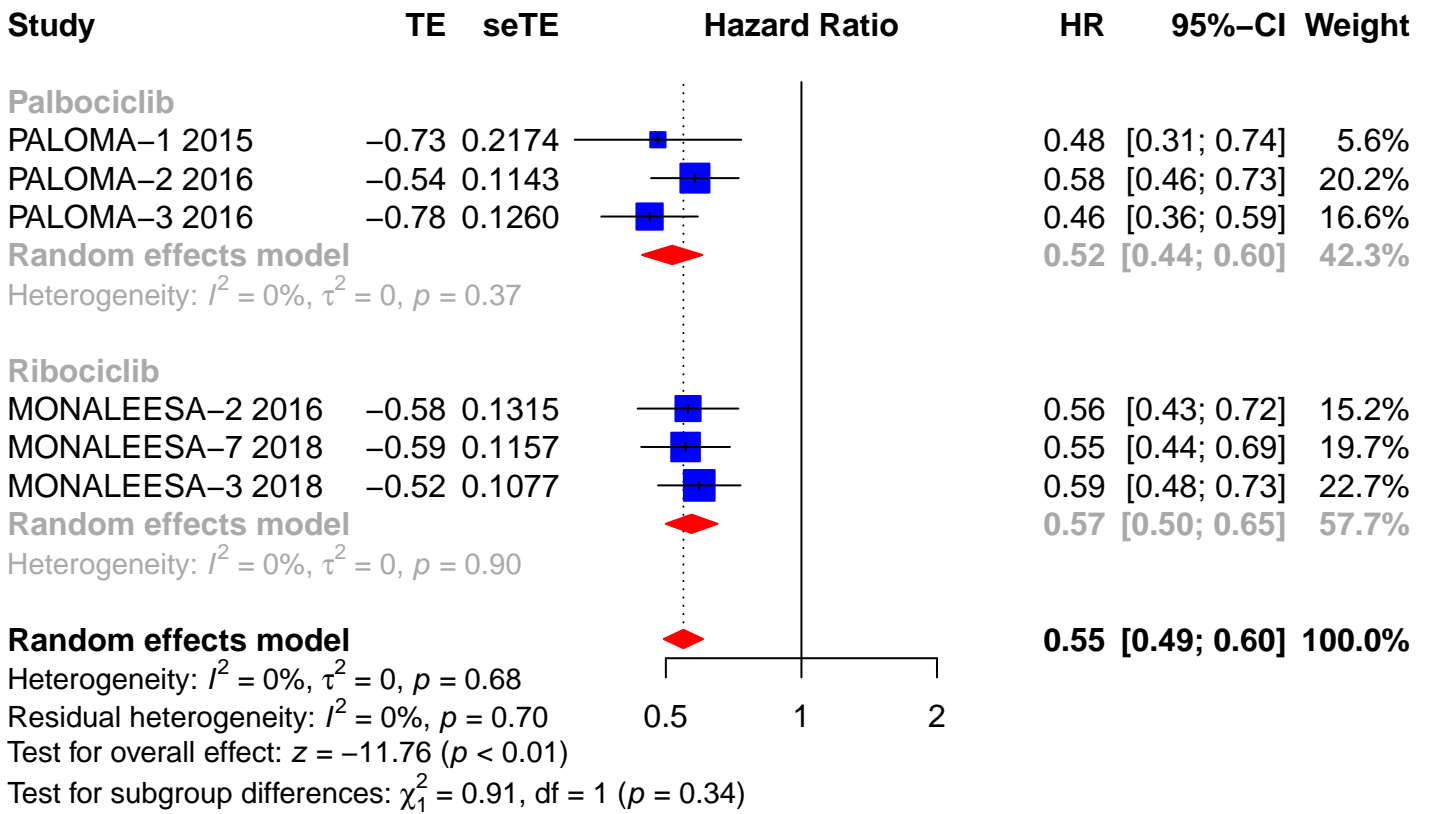

B

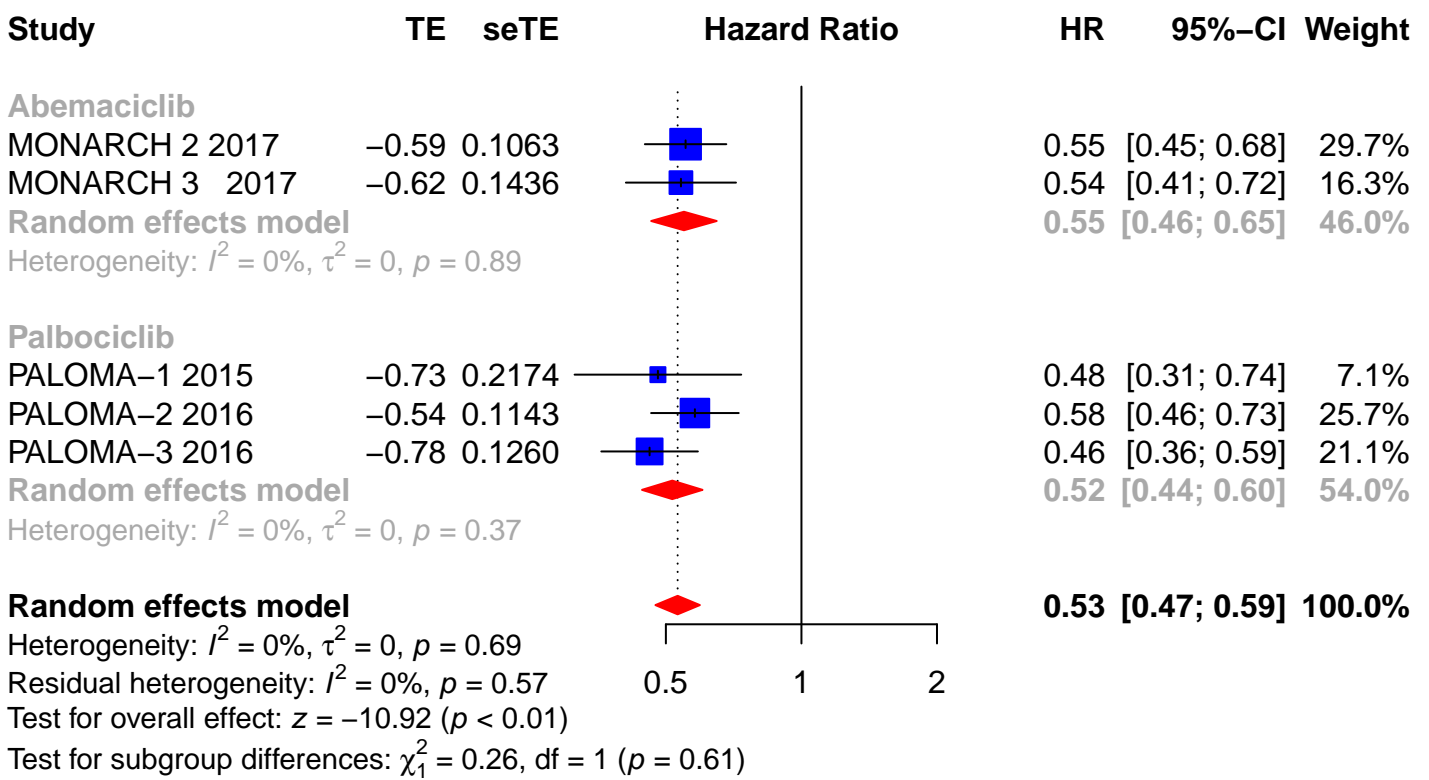

C

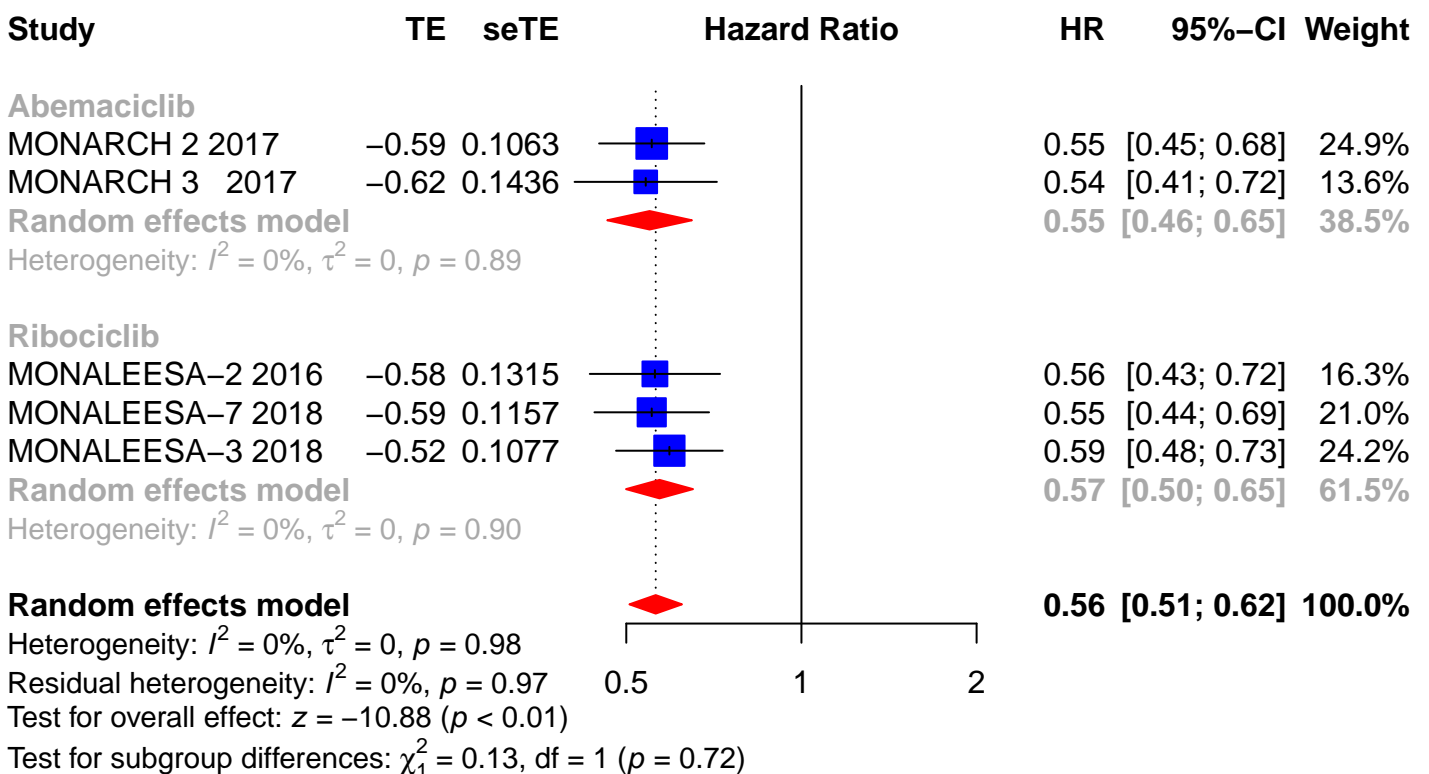

Supplement: Supplementary file 1 [file get_supplementary_file.php]
